# Supplementary material for: Progression of cardiovascular risk factors in black Africans: 3 year follow up of the SABPA cohort study
Source: PubMed Central journal article supplement (PMC4726657; doi:10.1016/j.atherosclerosis.2014.11.019), 2015-01
Supplement: mmc1.pdf [file mmc1.pdf]

## SUPPLEMENTARY DATA

**Table S1.** Descriptive data on CVD risk factors at baseline and follow up in the SABPA cohort study (2008-2011).

| <b>Risk factor</b>                                        | <b>Whites (n=186)</b> | <b>Blacks (n=173)</b> |
|-----------------------------------------------------------|-----------------------|-----------------------|
| <i>24hr Systolic BP (mmHg)</i>                            |                       |                       |
| Baseline                                                  | 124.5±1.0             | 133.1±1.0             |
| Follow-up                                                 | 123.2±1.0             | 135.8±1.1             |
| <i>24hr Diastolic BP (mmHg)</i>                           |                       |                       |
| Baseline                                                  | 77.2±0.6              | 83.7±0.7              |
| Follow-up                                                 | 75.6±0.6              | 83.9±0.7              |
| <i>Carotid Intima media thickness (mm)</i>                |                       |                       |
| Baseline                                                  | 0.65 ± 0.01           | 0.68 ± 0.01           |
| Follow-up                                                 | 0.70 ± 0.01           | 0.68 ± 0.01           |
| <i>Carotid cross-sectional wall area (mm<sup>2</sup>)</i> |                       |                       |
| Baseline                                                  | 13.3 ± 0.27           | 13.9 ± 0.28           |
| Follow-up                                                 | 15.1 ± 0.24           | 14.2 ± 0.25           |
| <i>Endothelin-1 (pg/mL)</i>                               |                       |                       |
| Baseline                                                  | 3.15 ± 0.50           | 2.72 ± 0.51           |
| Follow-up                                                 | 2.11 ± 0.39           | 2.62 ± 0.42           |
| <i>Total: HDL Cholesterol ratio</i>                       |                       |                       |
| Baseline                                                  | 5.08±0.12             | 4.43±0.13             |
| Follow-up                                                 | 4.45±0.11             | 4.90±0.11             |
| <i>Triglycerides (mmol/l)</i>                             |                       |                       |
| Baseline                                                  | 1.24±0.07             | 1.44±0.07             |
| Follow-up                                                 | 1.19±0.06             | 1.36±0.06             |
| <i>Glycated haemoglobin (%)</i>                           |                       |                       |
| Baseline                                                  | 5.52±0.07             | 6.11±0.07             |
| Follow-up                                                 | 5.58±0.08             | 6.23±0.08             |
| <i>Glucose (mmol/l)</i>                                   |                       |                       |
| Baseline                                                  | 5.70±0.11             | 5.71±0.12             |
| Follow-up                                                 | 4.42±0.13             | 5.72±0.13             |
| <i>Insulin (uU/mL)</i>                                    |                       |                       |
| Baseline                                                  | 12.31 ± 0.68          | 14.87 ± 0.71          |
| Follow-up                                                 | 10.38 ± 0.55          | 11.83 ± 0.58          |
| <i>Fibrinogen (g/L)</i>                                   |                       |                       |
| Baseline                                                  | 3.07±0.05             | 5.54±0.05             |
| Follow-up                                                 | 3.82±0.06             | 5.72±0.06             |
| <i>D-dimer (µg/L)</i>                                     |                       |                       |
| Baseline                                                  | 342.87 ± 30.02        | 471.24 ± 31.69        |
| Follow-up                                                 | 326.00 ± 35.46        | 506.60 ± 37.44        |
| <i>Interleukin-6 (pg/mL)</i>                              |                       |                       |
| Baseline                                                  | 1.16 ± 0.40           | 2.07 ± 0.42           |
| Follow-up                                                 | 3.70 ± 1.03           | 3.05 ± 1.09           |
| <i>Tumor necrosis factor-α (pg/mL)</i>                    |                       |                       |
| Baseline                                                  | 1.80 ± 0.19           | 3.31 ± 0.20           |
| Follow-up                                                 | 2.73 ± 0.14           | 3.05 ± 0.15           |
| <i>Body mass index (kg/m<sup>2</sup>)</i>                 |                       |                       |

|                                 |              |              |
|---------------------------------|--------------|--------------|
| Baseline                        | 27.72 ± 0.46 | 30.04 ± 0.48 |
| Follow-up                       | 28.75 ± 0.48 | 30.75 ± 0.49 |
| <i>Waist circumference (cm)</i> |              |              |
| Baseline                        | 93.49 ± 1.08 | 93.84 ± 1.12 |
| Follow-up                       | 96.14 ± 1.12 | 98.19 ± 1.16 |

Data are mean±SEM, adjusted for age and sex.

1  
2  
3  
4  
5  
6  
7  
8  
9  
10  
11  
12  
13  
14  
15  
16  
17  
18  
19  
20  
21  
22  
23  
24  
25  
26  
27  
28  
29  
30  
31  
32  
33  
34  
35  
36  
37  
38  
39  
40  
41  
42  
43  
44  
45  
46  
47  
48  
49  
50  
51  
52  
53  
54  
55  
56  
57  
58  
59  
60  
61  
62  
63  
64  
65
